# Supplementary material for: Consistent administration of cetuximab is associated with favorable outcomes in recurrent/metastatic head and neck squamous cell carcinoma in an endemic carcinogen exposure area: a retrospective observational study
Source: PeerJ. 2020 Sep 10;8:e9862. doi: 10.7717/peerj.9862 (PMC7487150; doi:10.7717/peerj.9862)
Supplement: Supplemental Information 1 [file peerj-08-9862-s001.xls]

## Sheet: Sheet1
age	diagnosis	alcohol	betel nuts	smoking	margin	margin	LVI	PNI	ENE	death	date of death	T	N	M	stage	Gr	stage	stage	op	surgery or not	CCRT	CCRT or not	chemotherapy or not before target therapy	PD under/after CCRT	reasons for Erbitux	reason for erbitux	stage while application	metastatic site	date of application for erbitux	cycles of erbitux	date of erbitux injection	cisplatin(1) or carbo(2)	regimen of chemotherapy	detailed regimen of chemotherapy	acceptance of Erbitux	chemotherapy dose	dosage of chemotherapy	CT response after erbitux	Best Response	stage	cycles of erbitux	PFS(m)	chart number	date of death	febrile	neutropenia	skin rash	anemia	hypomagnesemia
48	OC	1	1	1	0	0	0	0	0	1	20170526	2	2	0	pT2N2bM0	2	4	Iva	1	post op	1	Y/2016/08/25-10/12	1	0	R	recurrence	pM1	lung	2016/011	6	2017/01/12, 0202, 0209, 0217, 0224, 0324	1	1	EPF	1	1	60/600	2017/03/30 Chest CT:PD	4	4	6	3	24426235	2016-05-26	3	0	0	2	1
51	OC	0	0	1	0	0	0	0	NA	1	20180213	2	2	0	pT2N2b	1	4	IVa	1	post op	1	Y/2016/05/31~07/01	1	0	R	recurrence	ryTxNxM1	SCM	2017/01	15	2016/11/24, 12/1, 12/8, 12/15, 2017/01/03, 01/10 on 2017/02/17, 02/24, 03/13, 03/20, 04/07, 04/14, 5/29, 06/05,08/23	1	1	EPF	1	2	75/1000	PR	2	4	15	8	06928959	2018/02/13	0	0	0	1	0
56	OC									1	20170318	4	0	0	pT4aN0M0	2	4	IVA	1	post op	1	Y/12013/11/06~12/17	1	0	R	recurrence	rcT4aN0M0,	nil	2017/01		2017/01/26-03/02	1	1	EPF	1	1	60/600	2017/03/08:oral CT:PD	2	4		3	18039062	2017-03-18	0	0	1	1	1
61	OC	0	1	1		8	NA	NA	NA	1	20170615	2	0	0	ycT2N0M0	2	2	II	1	post op	1	Y/2016/12/22-2017/01/26	1	0	R	recurrence	cT4aN0M0	nil	2017/01	10	2017/02/03, 02/09, 02/16, 02/24, 03/03, 03/09, 03/16, 03/24, 03/31, 04/07	1	1	EPF	1	2	75/1000	106/04/07 oral CT:PD	4	2	10	3	29466826	2017/06/15	0	0	0	0	0
66	OC	1	1	1	0	0	1	1	1	1	20180111	4	2	0	pT4aN2bM0	2	4	IVA	1	post op	1	Y/2013/04-07	1	0	M	metastasis	cM1	lung	2017/01	9	2017/01/16, 01/23, 01/31, 02/06, 02/13, 02/20, 02/27, 03/04,03/09		3	E+Methotrexate sod (MTX)+UFUR	1		60/1000	106/03/15 Chest CT: PD	4	4	9	3	17074684	2018-01-11	0	0	1	0	1
46	OC	1	1	1	0	0	0	0	NA	1	20170503	4	2	1	cT4aN2cM1	2	4	IVC	1	post op	0	N(RT: 2016/5~6)	1	0	M	metastasis	cM1	lung	2017/01	10	2017/01/16,01/23,01/31,02/06,02/13,02/20,02/27,03/06,03/13,3/20	1	1	EPF	1	2	75/1000	106/03/17 oral CT:PD	4	4	10	3	30563936	2017-04-17	0	0	1	1	0
45	OPC	1	1	1		8	NA	NA	NA	1	20170720	4	1	0	cT4aN1M0		4	IVA	0	no	1	Y/CCRT	1	1	M	PD under CCRT	cM1	liver	2017/01	4	2017/02/01, 02/10, 02/17,02/24	1	2	ETP	1		60/600-> 60/60	PD(106/03/03:hematuria persistent)	4	4	4	3	30777236	2017-07-17	0	2	0	0	0
49	OPC	1	1	1	0	0	0	0	NA			4	0	0	rycT4aN0M0	2	4	I	1	post op	1	Y/2016/09/05-10/20	1	0	M	recurrence and metastasis	rycT4aN0M0	nil	2017/01	18	2017/01/20,01/26,02/03,02/10,03/03,03/17, 03/24, 03/31, 04/07; back Erbitux on 2017/05/19, 05/26;2017/07/14, 07/21, 07/28, 08/10, 08/17, 08/25, 09/01	1	2	ETP	2		75/1000->75/75	2017/04/18 oral CT:PR	2	4	18		21846219	survival	0	0	1	1	0
49	HPC	1	1	1	0	0				1	20170521	3	3	0	pT3(2)N3M0	2	4	IVB	1	post op	1	Y/2016/ 08/12-10/01	1	0	M	metastasis	cM1	lung	2017/01	9	2017/01/20,01/26, 02/03, 02/10, 02/16, 02/24, 03/03, 03/09, 03/16	1	1	EPF	1	2	75/1000	106/03/14 chest CT:PD	4	4	9	3	30689539	2017-05-21	0	0	1	1	1
64	OC	0	1	1		8	NA	NA	NA			4	2	0	cT4bN2M0	1	4	IVB	1	post op	0	palliative Intra-arterial infusion chemotherapy + concurrent radiotherapy start 2015/07/13-2015/09/09	1	1	M	recurrence(PD under PF)	cM1	spine	2017/01	18	2017/02/20,03/04,03/10,03/17,03/24,04/07,04/14,04/21, 04/28,05/12,05/19,05/26,06/02,06/13,06/30,07/07,07/14,07/21	2	1	E+ Carboplatin + 5-FU	2	2	(AUC5) + 5-FU (800-1000mg/m2)	2017/04/20 Oral CT:PR	2	4	18	33	29473922	survival	0	1	1	1	1
57	OPC	1	1	1		8	NA	NA	NA	1	20180813	3	0	1	cT3N0M1	3	4	IVC(left supraclavicular LN metastasis)	0	no	1	Y/2016/05-105/07	1	0	M	metastasis	cT3N0M0		2017/01	16	2017/02/03, 02/10, 02/17, 02/24, 03/03,03/10,03/24,04/03,04/21 0711,0812,0821,0828,0905,0915,0922	2	1	E+ Carboplatin + 5-FU	2	2	(AUC5) + 5-FU (1000mg/m2)	106/06/19 neck CT:PR	2	4	16	15	16045339	survival	0	0	1	2	1
66	OC	1	1	0	0	0	0	0	NA	1	20170425	0	2	0	rcT0N2M0	NA	4	IV	1	post op	1	Y/2016/11/04~12/23	1	1	R	PD	rcT0N2M0	nil	2016/12	6	2017/02/03, 02/10, 02/17, 02/24, 03/03, 03/10	1	1	EPF	1	2	75/1000	2017/04/24 oral CT:PD	4	4	6	3	29801622	2017-04-25	0	0	1	0	0
53	OC	1	1	1	0	0	0	0	0	1	20170427	2	2	0	pT2N2bM0	2	4	IVA	1	post op	1	Y/2016/9/14-11/2	1	0	M	metastasis	cM1	skin	2017/02	5	2017/02/27, 3/6, 3/14, 3/21, 3/27	1	1	EPF	1	2	75/1000	PD	4	4	5	2	13060331	2017-04-27	0	0	0	0	0
48	OC	1	1	1	0	0	0	0	0	1	20180815	4	0	1	cT4N0M1	1	4	IVC	1	post op	0	palliative Intra-arterial infusion chemotherapy + concurrent radiotherapy during 2016/11/04 -2017/01/31	1	0	M	metastasis	ryT4cN0M1	lung	2017/03	18	2017/03/17, 03/24, 03/31, 0/407, 04/14, 04/21, 04/28, 05/05, 05/13,10/30,11/14, 11/21, 11/28, 12/05, 12/11, 12/19, 12/26, 2018/01/02	1	1	EPF	2	2	75/1000	106/05/15 oral CT:PR	2	4	18	11	28491160	2018-08-14	0	1	1	0	1
63	HPC	1	1	1		8				1	20180312	2	3	0	cT2N3M0	3	4	IVb	1	post op	0	No	1	0	M	metastasis	cT2N3M1	lung	2017/03	14	2017/04/07, 04/14, 04/22, 05/05, 05/19, 05/26, 06/02, 06/13, 08/08, 09/02, 09/19,10/13,10/31, 11/13	2	1	E+ Carboplatin + 5-FU	2	1	Carboplatin 150mg, 5-FU 1000mg	106/06/14 chest CT:PR	2	4	14	11	31166147	2018-03-12	0	0	0	0	1
52	HPC	1	1	1	0	0				1	20180903	4	2	0	pT4aN2bM0	3	4	IVA	1	post op	1	Y/2016/05/18-07/04	1	0	M	metastasis	cM1	lung	2017/06	19	2017/06/17, 06/22, 06/30, 0/7/07, 07/15, 07/24, 07/31, 08/14, 08/25 09/12, 09/22, 09/29, 10/06, 10/13, 10/20, 10/27, 11/03, 11/10, 11/24	1	1	EPF	2	2	75/1000	106/08/14 chest CT:PR	2	4	19	10	30596117	2018-09-03	0	0	3	0	0
57	OPC	1	1	1	1	2	1	1	1	1	20170914	2	3	0	pT2N3M0	3	4	IVB	1	post op	1	Y/bioRT(self)2016/11/14~2017/01/06	0	1	M	PD after CCRT	cM1	lung	2017/06	15	2016/11/18,11/25,12/02,12/09,12/16,12/23,12/30, 106/01/06; 2017/07/25, 08/02, 08/09, 08/16, 08/23, 08/30, 09/08	1	1	EPF	1	2	75/1000	PD	4	4	15	2	24871911	2017-09-08	0	2	0	0	0
42	OC	1	1	1	0	0				1	20170907	2	2	0	cT2N2CM0	2	4	IVA	1	post op	1	Y/ 2016/04/25~06/07	1	1	M	metastasis	pT2N2b	Newly metastatic lymph nodes at left parotid gland	2017/06	4	2017/07/24.08/05.08/12.08/25	1	1	EPF	1	2	75/1000	106/08/28 chest CT:PD	4	4	4	3	31380385	2017-09-07	0	0	0	0	0
52	OPC									1	20170818	4	0	0	cT4aN0M0	3	4	IVA	1	post op	1	Y/2016/08/22-10/17	1	0	M	metastasis	cM1	bone and liver	2017/06	5	106/07/14, 07/21, 07/28, 08/04, 08/11	1	1	EPF	1	1	60/1000	PD	4	4	5	2	28578510	2017-08-11	0	0	0	0	0
65	HPC	1	1	1	0	0						4	0	0	pT4aN0M0	1	4	IVA	1	post op	0	no	1	0	M	metastasis	rcTxNxM1	lung	2017/05	20	2017/05/29, 06/05, 06/12, 06/19, 06/26, 07/03, 07/10, 07/17, 07/24, 07/31, 08/10, 09/07, 09/14, 09/21,2017/10/12, 10/26, 11/02, 11/09,11/16,11/23	1	1	EPF	2	1	60(5AUC)/1000	2018/10/04 chest CT:PD	3	4	20	16	29918518	survival	0	0	0	0	0
39	OC	1	1	1		8				1	20171209	2	1	0	ycT2N1M0	2	3	III	1	post op	1	Y/2016/09/12~10/04	1	0	M	metastasis	cM1	lung	2017/07	9	2017/08/11,08/18,08/29,09/05,09/23,09/29,10/06	1	1	EPF	1	2	75/1000	106/10/20 chest CT:PD	4	3	9	3	26765430	2017-12-09	0	0	0	0	0
53	OPC	1	1	1		8				1	20180607	1	0	0	cT1N0M0	1	1	l	1	post op	0	no	1	0	M	recurrence	cT1N0M0	nil	2017/06	9	2017/08/26 ,9/4, 9/11 , 9/18, 9/25, 10/02	1	1	EPF	2	2	75/1000	2017/10/09 head and neck MRI: PD	4	1	9	3	16102055	2018-06-07	0	0	1	0	1
50	OC	1	1	1	0	0	0	0	NA	1	20180320	4	2	0	cT4aN2bM0	2	3	lll	1	post op	1	Y/2016/04/08~2016/05/19	0	0	M	recurrence and metastasis	rcT4bN0M0	Brain	2017/08	18	2017/9/20-2018/01/26	1	1	EPF	2	2	75/1000	2017/11/03 Head and Neck MRI:SD	3	3	18	5	30540716	2018-05-14	0	0	0	0	0
79	OC	1	1	1		8	NA	NA	NA	1	20190222	4	1	0	cT4N1M0	1	4	4A	1	post op	1	Y/2018/01/15-2018/03/22	1	0	R	recurrence	rycT4aN0M0	nil	2017/05	18	2018/08/16-12/20	1	5	E+ cisplatin (60mg/m2)	2		60	2018/07/30 neck CT:SD	3	4	18	7	17910250	2019-02-22	0	0	0	0	0
47	OPC	0	0	1		8				1	20180319	4	3	1	T4aN3M1	2	4	IVC	0	no	0	no	1	0	M	metastasis	cM1	lung	2017/10	9	2017/11/14.11/21.11/28,12/05,12/19,12/26,107/01/02,01/09	1	1	EPF	1	2	75/1000	107/02/27 oral CT:PD	4	4	9	4	31580871	2018-03-20	0	0	2	0	1
55	OC and OPC	1	1	0	0	0				1	20181209	1	0	0	pT1cN0cM0	3	1	I	1	post op	1	Y/2017/04/11-05/26	1	1	R	PD after CCRT	cT2N2bM0	nil	2017/07	18	2017/08/05~107/02/20	1	1	EPF	2	2	75/1000	106/10/14:oral CT: PR	2	1	18	14	20337156	2018-12-14	0	0	1	1	0
54	OPC	1	1	1		8	NA	NA	NA	1	20180124	4	1	0	T4bN1M0	1	4	IVB	0	no	1	Y/106/03/30~05/31	1	1	R	recurrence	cT4b(m)N1M0	nil	2017/07	18	2017/07/29, 08/05, 08/14, 08/22, 08/28, 09/04, 9/11, 9/18,10/30, 11/06,11/17,11/24,12/1,12/11,12/18,12/25,2018/01/02	1	1	EPF	2	2	75/1000	106/10/06 neck CT:SD	3	4	18	6	31167307	2018-01-24	0	0	2	1	0
59	OC									1	20171027	1	1	0	pT1N1M0	2	2	II	1	post op	1	Y106/06/02~2017/06/03	1	0	R	recurrence	rycT4bN0M0	nil	2017/07	7	2017/8/14, 8/30 ,9/6 ,9/13, 9/20, 9/27, 10/6	1	1	EPF	1	2	75/1000	PD	4	2	7	3	26113893	2017-10-27	0	0	2	1	0
39	HPC	1	1	1		8				1	20180323	4	2	0	cT4aN2bM0	2	4	IVA	0	no	1	Y/106/01/06-03/03	1	1	R	PD after CCRT	ycT4aN0M0	nil	2017/08	16	2017/8/21, 08/29, 9/4,09/11, 09/18, 9/23, 10/02, 10/12,10/23, 11/3, 11/10, 12/02, 12/7, 12/11, 12/18,2018/ 01/19	1	1	EPF	2	2	75/1000	106/11/10 neck CT:SD	3	4	16	6	18320385	2018-03-16	0	0	1	1	0
45	OPC	1	1	1		8	NA	NA	NA			1	2	0	T1N2bM0	2	4	IVA	1	post op	1	Y/ 106/1/20-2/24	1	0	M	metastasis	yrcT2N2M0		2017/08	18	2017/8/21-2018/2/12	1	1	EPF	2	2	75/1000	106/11/07 neck CT:PR	2	4	18	15	30572410	N/A	0	0	1	0	0
46	OC											2	0	0	T2N0M0	1	2	II	1	post op	1	Y/101/12/20~102/01/31	1	0	M	metastasis	pT4a, margin+	nil	2017/08	20	2017/06/08,06/15,06/22,06/29,07/06,07/20,07/28,08/04,08/18, 09/29, 10/09, 10/16, 10/23, 10/30, 11/06, 11/13, 11/20, 11/27, 12/04, 12/11	1	1	EPF	2	2	75/1000	106/08/21 neck CT: SD	3	2	20	10	24179783	N/A	0	0	2	1	1
54	OC											4	2	0	cT4aN2cM0	NA	4	IVA	1	post op	1	Y/2015	1	0	R	recurrence	cM1	bone	2017/08	23	2017/06/22,06/29,07/06,07/13,07/21,07/28,08/04,08/11, 08/23, 09/01, 09/08, 09/15, 09/23, 09/30, 10/06, 10/13, 10/20, 10/28, 11/03, 11/10, 11/18,11/27,12/02	1	1	EPF	2	2	75/1000	106/08/24 oral CT:SD	3	4	23	8	31543349	N/A	0	0	1	1	0
40	OPC	1	1	1		8	NA	NA	NA	1	20180629	4	2	0	cT4bN2bM0	1	4	IVA	1	post op	1	Y/106/04/17-05/13	1	0	R	recurrence	T4a	nil	2017/09	11	2017/9/22, 10/02, 10/09, 10/16, 10/30, 11/06, 11/14, 11/20, 11/27, 12/4, 12/11	1	1	EPF	1	2	75/1000	106/12/22 neck CT:PD	4	4	11	3	27716855	107/6/29	0	1	0	2	0
65	OC	1	1	0	1	2	0	0	0	1	20180123	2	1	0	T2N1M0	1	3	III	0	no	1	Y/106/03/16~06/06	1	0	M	metastasis	rcT4aN2bM0		2017/09	5	2017/11/23,12/07,12/14,2018/01/04,01/11		6	E+UFUR	1		nil	PD	4	3	5	2	28933202	2018-01-22	0	0	0	0	0
76	OC	1	1	0	1	2	0	1	0	1	20190128	2	0	0	pT2N0cM0	1	2	II	1	post op	0	no	0	1	M	metastasis, PD under CCRT	cM1	mediastinal LN	2017/09	9	2017/11/23-2018/01/29		6	E+UFUR	1		nil	107/01/15 chest CT:PD	4	2	9	2	25112282	2019-02-11	0	0	0	0	0
38	OC	1	1	1	0	0				1	20171227	3	2	0	pT3N2bM0	2	4	IVA	1	post op	1	Y/106/06/15-07/31	1	1	M	recurrence+metastasis	cM1	lung	2017/09	9	2017/10/26,11/2,11/9,11/16,11/23,11/30,12/7,12/14.12/21	1	2	EPF*1->ETP	1		75/100->75/75	PD	4	4	9	2	31457389	2017-12-27	0	1	0	0	0
53	HPC	1	0	1		8						2	2	0	cT2N2cM0	3	4	IVA	0	no	1	Y/2016/07/28-09/23; 2017/06/02- 06/30	1	1	M	metastasis, PD under CCRT	cT3N2cM0	nil	2017/09	9	2018/4/4, 4/10, 4/17, 4/24, 5/15, 5/22, 6/14 7/25, 8/7	1	1	EPF	1	2	75/1000	107/09/03 neck CT:PD	4	4	9	6	30824658	2019-03-20	2	0	0	1	0
53	OC	1	1	1	0	0	1	1	1	1	20180312	4	2	0	cT4aN2aM0	3	4	IVA	1	post op	0	no	1	1	M	recurrence (PD under PF)	rpT4aN2cM1	lung, bone	2017/09	9	2017/10/02~2017/12/27	1	1	EPF	1	2	75/1000	2018/01/08 chest CT:PD	4	4	9	3	31178434	2018-03-12	0	0	1	1	0
52	OC	0	1	1	0	0						4	1	0	cT4aN1M0	2	4	IVA	1	post op	0	no	1	0	R	Recurrence	pT4bN0M0	nil	2017/10	20	2017/12/14,12/21,12/28,2018/01/05,01/11,01/19,01/26,02/02,02/09,07/20, 07/28, 08/03, 08/10, 08/17,08/24, 0831, 09/07, 09/14, 09/21, 09/28		7	RT	2		nil	2018/06/25 oral CT:CR	1	4	20	24	31513719	survival	0	0	2	1	1
53	HPC	1	1	1	0	0						2	2	0	cT2N2bM0	2	4	IVA	1	post op	1	Y2016/07/26~2016/09/13	1	0	M	recurrent and metastasis	cM1	lung	2017/10	11	2017/08/01-09/08;2018/11/09-2019/1/8.2019/3/15, 3/22, 4/5, 4/12, 4/19, 4/26,5/3,5/10,5/17,5/24,5/31	1	2	ETP	1		35/35	2019/01/23 neck CT:PR	2	4	11	11	22148007	survival	0	0	2	1	0
80	OC	1	1	0	0	0	0	1	NA	1	20180320	1	0	0	T1N0M0	2	1	I	1	post op	0	no	0	0	R	recurrence (PD under UFUR)	ry cT0 pN2b M0	nil	2017/12	11	2017/ 12/18, 12/25, 2018/01/02(250 mg/m^2, self paid 400mg), 01/08, 01/15, 01/22, 01/29, 02/06, 0/213, 02/27, 03/06		7	E	1		nil	2018/03/15 CT:PD	2	1	11	3	19381237	2018-03-21	0	0	0	0	0
68	OC	1	1	1	0	0				1	20180512	4	2	0	cT4aN2bM0	2	4	IVA	1	post op	1	Y/2017/07/10~2017/08/24	1	0	M	metastasis	cM1	lung	2018/01	9	2018/02/02, 2018/02/09, 2018/02/19, 2018/03/02, 03/16, 03/23, 03/30, 04/06, 04/13	1	1	EPF	1	2	75/1000	2018/04/20 chest CT:PD	4	4	9	3	22471467	2018-05-14	0	0	2	0	0
54	OC	1	1	1		8				1	20180618	4	2	1	T4bN2cM1	3	4	IVC	0	no	0	no	0	0	M	metastasis	cM1	lung	2018/01	12	2018/02/19,02/26, 03/13, 03/20, 03/31, 04/07, 04/13, 04/20, 04/27,05/08,05/15, 6/11	1	1	EPF	2	2	75/1000	2018/05/15 chest CT:PR	2	4	12	5	23884198	2018-06-18	0	0	1	1	1
55	OC	1	1	1	0	0				1	20180430	3	2	0	pT3N2cM0	2	4	IVA	1	post op	1	Y/ CCRT 2017/07	1	0	M	metastasis	rycT0N2cM1	lung	2018/01	9	2018/2/5-4/10	1	1	EPF	1	1	60/800	2017/04/25 chest CT:PD	4	4	9	3	31541233	2018-04-30	0	1	1	1	0
41	OC	1	1	0	1	2				1	20180820	4	2	0	T4bN2bM0	1	4	IVB	1	post op	1	Y/2016/10/12~2016/11/22	0	0	R	Recurrence	cM1	lung;bone	2018/01	9	2018/02/15-04/20	1	1	EPF	1	1	40/750(QW)	2018/05/25 chest CT:PD	4	4	9	4	29798233	2018-08-20	0	0	0	0	0
41	HPC	1	1	1	0	0	NA	NA	NA	1	20180611	3	2	0	cT3N2bM0	2	4	IVA	0	no	1	Y/2016/03/25~2016/07/25	1	1	R	recurrence (PD under PF)	cT3N2bM0	nil	2018/01	9	2018/02/21,02/28, 03/07, 03/13, 03/20, 03/27, 04/04, 04/18	1	1	EPF	1	2	(AUC5) + 5-FU (1000mg/m2)	2018/04/19 oral CT:PD	4	4	9	3	30481942	2018-06-11	0	1	0	0	0
53	OC	1	1	1	0	0				1	20181029	4	2	0	cT4aN2bM0	1	4	IVA	1	post op	1	Y/2017/07/21~2017/09/06	1	0	R	recurrence	rcT4AN1M0	nil	2018/01	9	2018/02/27-07/10	1	1	EPF	1	1	60/600	2018/6/14 oral CT:PD	4	4	9	5	24749663	2018-08-10	0	0	0	0	0
45	OC	1	1	1	1	2	1	1	1	1	20180810	4	2	0	cT4aN2bN0	2	4	IVA	0	no	1	Y/2017/06/29~2017/08/15	1	1	M	recurrence (PD under PF)	cM1	brain	107/2	23	2018/2/09, 02/15, 02/23, 03/02, 03/09, 03/16, 03/24,04/02,04/09,04/16, 04/25, 05/02, 05/11, 05/25(self-paid),06/01,06/08,06/15, 06/22,06/29, 07/06, 07/13, 07/20, 07/27	1	2	ETP	2		75/75	2018/05/24 Brain MRI:SD	3	4	23	8	31413220	N/A	0	0	0	0	1
51	OPC	1	1	1	0	0	0	0	NA			1	1	0	cT1N1M0	2	3	III	0	no	1	Y/2018/02/19~2018/04/03	1	0	M	recurrent and metastasis	rT0N1M0	lung	107/2	23	2018/05/25, 6/1,6/15,6/19,6/27,7/4, 8/10, 8/24, 09/07, 09/14, 09/21,11/02,11/09, 11/16, 11/23, 11/30, 12/7, 12/21, 12/29, 2019/01/04,02/15, 03/01, 03/06	1	1	EPF	2	1	60/800	2018/09/28 neck CT:PR	2	3	23	17	14992625	survival	0	0	0	0	0
65	HPC	0	1	0	0	0	NA	NA	NA	1	20181114	2	2	0	cT2N2bM0	2	4	IVA	1	post op	1	Y/2016/08/04~2016/09/22	1	0	M	recurrent and metastasis	cM1	lung	107/2	21	2018/03/02, 03/09, 03/16, 0/324, 03/30, 04/06, 04/13, 04/20, 04/27, 05/11, 05/22, 06/15, 06/26, 07/03, 07/17, 08/07, 08/21, 08/28, 09/04, 09/11, 09/18		4	pacli QW	2		75/1000->total 100mg	2018/05/24 chest CT:SD	3	4	21	11	30544543	2018-11-13	0	0	0	1	0
57	HPC	1	0	1	1	2	0	1	NA			2	2	0	cT2(2)N2bM0	2	4	IV	0	no	1	Y/2018/01/03~2018/02/23	1	1	R	PD after CCRT	cT2(2)N2bM0	nil	2018/03	4	2018/04/06, 04/16, 04/23, 04/30	2	1	E+ Carboplatin + 5-FU	1	2	(AUC5) + 5-FU (1000mg/m2)	2018/04/30 oral CT:PD	4	4	4	2	11574953	2018-05-02	0	1	0	0	0
55	OC	1	0	1		8				1	20180502	2	0	0	pT2N0M0	2	2	II	1	post op	1	Y/2017/04/05~2017/05/17	0	0	R	recurrence	cN2c	nil	107/3	21	2018/3/16, 03/23, 04/03, 04/10, 04/16,0 4/23, 04/30, 05/08, 05/14,05/21,5/28,6/25, 07/02, 07/10, 07/16, 07/23, 8/6, 8/13, 08/20, 08/27, 09/03	1	1	EPF	2	2	75/1000	2018/06/04 oral CT:PR	2	2	21	17	24674128	survival	0	0	2	1	0
57	OC	1	1	1	1	2	0	0	NA			1	0	0	cT1N0M0	2	1	I	1	post op	0	no	1	0	R	recurrence	rycT4aN0M0		107/3	18	2018/03/27, 04/03, 04/10, 04/17, 04/23, 04/30, 05/08, 05/15, 05/22, 07/03, 07/24, 07/31, 08/06, 08/13, 08/21, 08/28, 09/04, 10/05	1	1	EPF	2	2	75/1000	2018/06/11 oral CT:PR	2	1	18	20	26306775	survival	0	0	0	0	0
59	OC	1	1	1		8	NA	NA	NA	1	20180818	4	2	0	cT4aN2c	1	4	IVA	1	no	0	no	1	0	M	metastasis	rycT4aN2cM0	lymph nodes	107/3	9	2018/04/05~2018/08/31	1	1	EPF	1	1	75/1000->60/600	PD	4	4	9	3	30812510	2018-08-11	0	0	0	0	0
78	OC	0	0	0	0	0	0	0	NA			1	0	0	T1N0M0	2	1	I	1	post op	0	no	0	0	M	metastasis	cM1	bone	107/3	22	2018/04/16, 04/23, 04/30, 05/07, 05/14, 05/21, 05/28, 06/04, 06/11, 0620, 07/16, 07/23,08/06, 08/13, 08/20, 08/27, 09/03, 09/10, 09/17, 09/25, 10/01, 10/08		7	E	2		nil	2018/5/30 oral CT:SD	3	1	22	20	13089517	survival	0	0	0	0	0
52	HPC	0	0	1	0	0						4	0	0	pT4aN0M0	2	4	IVA	1	post op and CCRT and PF	1	Y/2017/04/20~2017/06/16	1	1	M	recurrence (PD under PF)	cM1	bone	107/4	19	2018/ 04/20,04/27,05/04,05/13,05/18, 06/04, 06/11, 06/19, 06/26, 09/22, 10/08, 10/15, 10/22, 12/03, 12/14, 12/21, 2019/01/04, 01/11, 01/18	1	1	EPF	2	1	60/800	2018/07/16 neck CT:PR	2	4	19	20	18464551	survival	0	0	2	1	1
54	OC	1	0	1		8				1	20190324	4	2	0	cT4bN2bM0	1	4	IVB	0	post induction and CCRT, PF	1	Y/2017/09/21~2017/11/10	1	0	M	metastasis	cT4bN0M0		107/4	11	2018/5/11, 5/18, 5/25, 6/2, 6/9, 6/15, 6/22, 6/29, 7/6, 7/13, 7/23	2	2	Carboplatin + paclitaxel	1		5/175	2018/08/11 oral CT:PD	4	4	11	3	31600269	2019-03-24	0	0	0	0	1
69	HPC	1	1	1	0	0				1	20190103	3	2	0	pT3N2bM0	2	4	IVA	1	post op	0	no	1	0	M	metastasis	cM1	lung	107/4	11	2018/05/02, 05/11, 5/25, 6/5, 06/12, 06/20, 07/03, 7/10, 07/17, 07/24, 07/31	1	1	EPF	1	1	60/800	2018/08/07 Chest CT:PD	4	4	11	3	30186844	2018-12-28	0	0	1	3	0
58	HPC	1	0	1		8				1	20190905	2	2	0	T2N2M0	2	4	IVA	1	post op	1	Y/2017/04/20-2017/06/16	1	0	R	recurrence (PD under PF)	cT1N2cM0	nil	107/4	24	2018/07/10,07/17,07/24,07/31,08/07,08/14,08/21,08/28,09/04,9/11,9/18,9/25,10/2,10/9,10/16,10/30,11/6,11/21, 12/4,12/11, 12/18, 12/25, 2019/1/2, 2019/1/8	1	1	EPF	2	1	60/1000	PR	2	4	24	10	27323827	2019-09-05	0	0	0	1	0
44	OC											4	0	0	pT4aN0M0	NA	4	IVA	1	post op	1	Y/2017/07	1	0	M	metastasis	rycT4aN3bM0	neck	107/4	16	2018/04/29, 0/508, 05/15, 05/22, 05/29, 06/05, 06/12, 06/19, 06/26, 07/03, 07/10, 07/30,08/14, 08/21,08/30, 09/11	1	1	EPF	2	2	75/1000	2018/07/10 oral CT:PR	2	4	16	6	32319520	2018-12-09	0	1	1	1	1
54	OC									1	20180828	4	2	0	T4aN2cM0	2	4	IVA	0	no	0	no	1	1	M	PD and metastasis	cM1	lung	107/4	12	2018/4/18, 2018/4/25, 5/02, 5/08, 5/22, 5/29, 6/11, 6/28, 7/5, 7/12, 7/17, 7/24	1	2	ETPF	1		75/75/750	2018/07/26 neck CT:PD	4	4	12	4	28250603	2018-08-28	0	0	0	1	1
47	OC	0	0	0	0	0				1	20190413	3	2	0	pT3N2aM0	3	4	IVA	1	post op	1	Y/2018/4/30-06/15	1	0	M	metastasis	cM1	skin	107/4	10	2018/11/12, 11/19, 11/27, 12/03, 12/10,12/17, 12/24, 12/31, 1/8, 1/15	1	1	EPF	1	2	75/1000	2019/01/31 oral CT:PD	4	4	10	3	23633748	2019-04-13	1	1	1	1	0
68	OC	1	1	1	0	0				1	20180512	4	2	0	cT4aN2bM0	2	4	IVA	1	post op	1	Y/2017/07/10~2017/08/24	1	0	M	metastasis	cM1	lung	107/4	9	2018/02/02, 02/09, 02/19, 03/02 , 03/16, 03/23, 03/30, 04/06, 04/13	1	1	EPF	1	2	75/1000	2019/04/20 chest CT:PD	4	4	9	3	22471467	2019-05-12	0	0	0	0	0
46	OPC	1	1	1	0	0	0	0	0	1	20190223	2	1	0	pT2N1M0	2	3	III	1	post op	1	Y/2018/09/26~2018/11/20	1	1	M	metastasis(PD during CCRT)	cM1	bone	107/4	19	2018/05/15, 05/22, 05/29, 06/12, 06/26, 07/03, 07/10,0 7/17, 08/14, 08/21, 08/28,0 9/18, 09/25, 10/02, 10/09, 10/16, 10/23, 11/09, 11/16	1	1	EPF	2	2	75/1000	2018/07/25 oral CT :SD	3	3	19	8	30755108	2019-02-20	0	0	1	1	1
59	HPC	0	0	1	1	1				1	20181127	4	2	0	cT4aN2bM0	3	4	IVA	1	post op	1	Y/2018/02/19~04/10	1	1	M	metastasis	cM1	skin and lung	107/4	15	2018/05/16, 05/22, 06/20, 6/26, 07/13, 07/20, 7/27, 08/07, 8/14, 8/21, 09/06, 09/12, 09/18, 09/25, 10/01	1	1	EPF	2	2	75/1000	2018/08/15 chest CT:PR	2	4	15	6	32095204	2018-11-27	0	0	1	1	0
59	HPC	0	1	1	1	2				1	20190826	1	2	0	cT1N2bM0	2	4	IVA	1	post op	1	Y/2017/10/17-12/04	1	0	M	recurrence and metastasis	cM1	lung	107/5	23	2018/05/28, 06/05, 06/12, 06/19, 06/29, 07/06, 07/13, 7/20, 7/30, 8/6, 8/13,09/10, 09/17, 09/25, 10/01, 10/08, 10/15, 10/22, 10/29, 11/5, 11/12, 11/19, 11/26	1	2	ETP	2		75/75	2018/08/15 chest CT:PR	2	4	23	10	31799692	2019-08-26	1	1	1	1	1
62	HPC	1	1	1		8						2	1	0	cT2N1M0	2	3	III	1	post op	1	Y/2017/08/14~2017/10/13	1	0	M	recurrence and metastasis	cT2N3bM0	left neck	107/5	10	2018/05/11,05/21,05/28,06/04,06/11, 06/19, 06/26,07/03,07/09,7/24	1	2	ETP-> pacli	1		60/60->60/800->80	2018/07/26 neck CT:SD	3	3	10	12	24954974	2019-08-23	0	0	1	1	2
67	OC	1	1	1	0	0	0	1	NA	1	20180712	0	2	0	cT2N0M0, rT0N2aM0	2	2	II	1	post op	1	Y/ 2017/02/06-03/23	1	0	M	metastasis	cM1	lung and bone	107/5	5	2018/05/23, 05/29, 06/08,06/28, 07/05	1	1	EPF	1	2	75/1000	PD	4	2	5	2	21874885	2018-07-21	0	0	0	0	1
49	OPC	1	1	1		8				1	20190223	3	2	0	cT3N2cM0	2	4	IVA	0	no	1	Y/2017/11/07-2018/01/12	1	1	M	recurrence(PD under PF)and metastsais	cM1	lung and bone	107/5	18	2018/06/09, 06/19, 06/26, 07/03, 07/10, 07/17, 07/24, 08/07, 8/29, 09/18, 09/25, 10/09, 10/16, 10/23, 10/30, 11/06, 11/13, 11/20	1	1	EPF	2	1	60/800	2018/08/31 chest CT:PR	2	4	18	6	31918636	2019-02-12	1	0	1	2	1
56	OC	1	1	1		8				1	20181222	4	0	0	cT4aN0M0	1	4	IVA	0	no	1	Y/ 2017/10/11 - 11/24	1	0	M	recurrence and metastasis	cT3N0M0	bone	107/5	17	2018/06/13, 06/20, 06/29, 07/06,07/13,07/20,07/27,08/03,08/10,09/14, 09/21, 09/28, 10/05, 10/12, 10/26, 11/02, 11/09	1	1	EPF	2	2	75/1000	2018/08/13 oral CT:SD	3	4	17	6	17871055	2018-12-22	0	1	0	1	1
44	OC											4	2	1	cT4aN2bM1	2	4	IVC	1	post op	0	no	1	0	R	recurrence	cM1	lung	107/5	16	2018/6/12, 6/19, 6/26, 07/10, 07/17, 07/24, 07/31,08/07,08/14, 08/21,0 8/28,10/04, 10/12, 10/19, 10/26, 11/09	1	1	EPF	2	2	75/1000	2018/09/04 chest CT:PR	2	4	16	6	24290124	2018-11-09	0	0	1	1	1
54	HPC	1	1	1		9				1	20190729	2	2	0	cT2N2cM0	3	4	IVA	1	post op	1	Y/2017/10/03~2017/11/24	1	0	R	recurrence	ypT1(2)N3b	nil	107/6	21	2018/07/16, 07/23,07/30,08/6,08/13, 08/21, 08/28, 09/04, 09/11, 09/19, 9/2, 11/10, 11/15, 11/22, 11/30, 12/07, 12/14, 2019/01/15, 01/21, 01/28, 02/11		4	E+pacli	2		150	2018/10/15oral CT:SD	3	4	21	9	31624982	2019-07-29	0	0	1	1	1
66	OPC	0	0	0		8				1	20190218	4	3	1	cT4aN3aM1	3	4	IVC	0	no op	0	no	1	0	M	metastasis	cT4aN3aM1	bone	107/7	17	2018/07/17, 07/24, 07/30, 08/06, 08/13, 08/20, 08/27, 09/03, 10/19, 10/26, 11/02, 11/9, 11/15, 11/22, 11/30, 1207, 1214	1	1	EPF	2	2	75/1000	2018/09/26 neckCT:PR	2	4	17	7	16617862	2019-02-18	0	1	1	1	0
49	HPC	1	1	1	0	0				1	20190309	2	2	0	cT2N2cM0	2	4	IVA	1	post op	1	Y/2017/07/03~2017/08/03	1	1	M	metastasis(PD under CCRT)	cM1	lung	107/8	9	2018/09/07, 09/14, 09/21, 10/19, 10/26, 1102, 11/09.11/30,12/07	1	2	Cis+Pali+E	1		75/175	2018/11/28 chest CT:PD	4	4	9	3	31512834	2019-02-16	0	0	0	1	1
57	OC											1	0	0	cT1N0M0	2	1	I	1	post op	1	Y/2018/07/17-07/31	1	1	M	recurrence and metastasis	cM1	lung	107/8	9	2018/08/14,08/21, 08/28, 09/04, 09/11, 09/18, 09/26, 10/03, 10/10	1	1	EPF	1	1	60/800	2018/09/26 chest CT:PD	4	1	9	2	14086265	2018-10-13	1	1	1	3	1
60	OPC	1	1	1		8	NA	NA	NA	1	20190127	4	2	0	T4aN2M0	1	4	IVA	0	no	1	Y/2015/03/05~05/21	1	1	R	PD under CCRT	cT4aN2cM0	nil	107/8	9	2018/10/01,10/08,10/15,10/22, 10/29, 11/05, 11/12, 11/19, 11/26	1	1	EPF	1	1	60/800	2018/12/10 oral CT:PD	4	4	9	3	24740742	2019-01-27	0	1	1	1	1
65	OC	0	0	0	0	0				1	20190112	4	2	0	cT4aN2bM0	2	4	IVA	1	post op	1	Y/2018/06/20-08/03	1	1	M	recurrence and metastasis	cM1	lung	107/8	9	2018/09/12~2018/12/03		3	MTX	1		50	2018/12/10 neck CT:PD	4	4	9	3	20124210	2019-01-12	0	1	1	2	1
53	OC	1	1	1		9						4	0	0	T4aN0Mb	2	4	IVA	1	post op and CCRT	1	Y/2018/07/06- 08/27	1	1	R	recurrent	T4b	nil	107/8	4	2018/9/20, 10/5, 10/12, 10/19		1	EPF	1	2	75/1000	2018/11/21 chest CT:PD	4	4	4	3	32329604	2018-12-15	0	0	1	1	1
52	OC	1	1	1	0	0				1	20181229	1	2	0	cT1N2cM0	3	4	IVA	1	post op and CCRT	1	Y/CCRT	1	1	M	PD after CCRT;metastasis	pT4aN2cM1	lung	107/8	8	2018/10/09, 10/16, 10/23, 10/30, 11/06, 11/13, 11/20, 11/27	1	1	EPF	1	1	60/800	2018/12/06 chest CT:PD	4	4	8	3	29950095	2018-12-21	0	1	0	2	1
50	OPC	1	1	1		8				1	20190519	2	2	0	cT2N2cM0	2	4	IVA	0	no	1	Y/ 2018/06/19-08/06	1	0	M	metastasis	cT2N2cM0	lymph nodes in the right level IIA left level IIA	107/8	18	2018/10/05, 10/12, 10/19, 10/26, 11/02, 11/09, 11/16, 11/23, 11/30, 2019/01/09, 01/19, 01/25, 02/01, 02/15, 02/26, 03/8, 03/15, 03/22	1	2	TPEx	2		75/1000-> 35/35	2018/12/07 oral CT:SD	3	4	18	7	22212557	2019-05-19	0	1	1	1	1
48	OC	1	1	1	0	0				1	20190515	1	0	0	rpT1N0M0	1	1	l	1	post op	1	Y/2018/05/23-07/09	0	1	R	recurrent	cT4AN0M0	nil	2018/09	22	2018/9/21, 9/28, 10/5, 10/12, 10/19, 10/26, 11/02, 11/09, 11/16, 11/23, 12/1, 12/28, 2019/01/04, 01/11,01/18, 01/25, 02/01, 02/08, 02/15, 02/22, 03/01, 03/08	1	1	EPF	2	2	75/1000	2018/12/03 oral CT:SD	3	1	22	10	28336385	survival	0	0	1	1	1
85	OC	0	1	1	0	0	0	0	NA			3	2	0	cT3N2bM0	2	4	IVA	1	post op	0	no	0	0	R	recurrent	pT3N2bM0	nil	2018/09	18	2018/09/15, 09/22, 09/29, 10/05, 10/12, 10/24, 11/02, 11/09, 11/16, 12/07, 12/14, 12/21, 12/28,2019/01/04, 01/11, 01/18, 01/25, 02/01		6	UFUR	2		nil	2018/11/02 neck CT:PR	2	4	18	13	27108377	survival	0	0	0	1	0
42	OC	0	0	0		8						3	3	0	pT3N3b	2	4	IVB	1	post op	1	Y/2018/4/3~07/06	1	1	M	recurrence and metastasis	cM1	lung	2018/09	20	2018/10/31, 11/06, 11/13, 11/20 , 12/4, 12/11, 12/18, 12/25, 2019/01/08, 01/15, 02/12, 02/19, 02/26, 03/05, 03/12, 03/19, 03/26, 04/02, 04/09, 04/16	1	1	EPF	2	1	60/800	2019/01/23 oral CT:PR	2	4	20	7	32236554	2019-05-15	0	1	1	1	1
66	OC	1	1	1	1	2				1	20190616	4	2	0	pT4aN2acM0	2	4	IVA	1	post op	1	Y/ 2018/08/03-09/19	0	1	R	PD after CCRT	cT4a	nil	2018/10	17	2018/10/16, 10/23, 10/30, 11/06, 11/13, 11/20, 11/27, 12/4, 12/11, 12/25, 12/31, 2019/0 1/25, 02/01, 03/01, 03/08, 03/15,03/22	1	1	EPF	2	2	75/1000	2017/012/31 oral CT:PR	2	4	17	7	32449050	2019-06-16	0	0	1	1	1
52	OC											4	3	0	pT4aN3b	2	4	IVB	1	post op	1	Y/2017/11	1	0	R	recurrence	cT4a	nil	2018/10	12	2018/10/24,10/30,11/06,11/13, 12/4, 12/11, 12/17, 12/24, 12/31, 2019/01/08, 01/15, 01/25	1	2	ETP	1		30/30	2019/01/26 oral CT:PD	4	4	12	4	32535188	2019-04-05	0	1	1	1	1
52	OPC	1	1	1		8						4	2	0	cT4aN2bM0	2	4	IVA	0	no	1	2017/11/22~2018/01/10	1	0	M	recurrence (PD under PF)	cM1	lung	2018/10	21	2018/11/06, 11/13, 11/20, 11/27, 12/04, 12/11, 12/21, 12/28, 2019/01/04, 01/11, 01/18, 02/01, 02/26, 03/04, 03/12,03/19, 03/26, 04/02, 04/09, 04/16, 04/23	1	1	EPF	1	2	75/1000	2019/01/17 chest CT:SD	3	4	21	7	31678293	survival	0	1	1	1	1
65	OC	1	1	1		8						4	2	0	cT4aN2bM0	2	4	IVA	1	post op	0	no	1	0	R	PD	pT4aN0M0	nil	2018/11	12	2019/01/05, 01/11, 01/18, 01/25, 02/08, 02/15, 02/22, 03/01, 03/08,04/23, 04/29, 05/08		7	E+R/T	2		nil	2019/3/29 oral CT:SD	3	4	12	6	30164936	2019-06-26	0	0	0	1	0
51	OC	1	1	1	0	0	0	1	NA	1	20190626	4	2	0	cT4AN2CM0	2	4	IVA	1	post op	1	Y/2018/03/12~2018/04/26	1	0	M	metastasis	pT2N3BM1	lung	2018/12	17	2018/12/11, 12/18, 12/25, 12/31, 2019/01/08, 1/15, 1/22, 1/29, 02/12 03/16, 03/23, 4/8, 4/19, 4/26, 05/03, 05/24, 05/31,06/14,06/21	1	1	E+R/T+PF	2	1	60/600	2019/03/04 chest CT:PR	2	4	17	9	25606370	survival	0	0	0	0	0
58	OC	1	1	1	0	0						4	1	0	cT4aN1M0	2	4	IVA	1	post op	1	Y/ 2018/03/08- 04/19	1	0	R	recurrence	cT2N0M0	nil	2018/12	20	2019/01/29, 02/11, 02/18, 02/26, 03/05, 03/12, 03/19, 03/26, 04/02, 04/08, 04/15, 04/26, 05/03, 05/10, 05/17, 05/24, 5/31, 06/14, 06/21, 06/28	1	1	EPF	2	1	60/600	2019/04/08 oral CT:SD	3	4	20	7	30361169	2019-09-19	0	1	1	1	1
77	OC	1	1	1	0	0	0	0	0	1	20190919	4	3	0	cT4AN3BM0	1	4	IVB	0	no	1	Y/2018/07/18~2018/09/11	1	0	R	PD	T4aN3bM0	nil	2019/01	18	2019/01/18~2019/05/24		1	EPF->E+MTX	2	1	60/800->50	2019/04/17oral CT:SD	3	4	18	6	23683808	2019-07-04	0	1	1	1	1
58	OC	1	1	1		8				1	20190704	1	0	0	cT1N0M0	1	1	l	1	post op	1	Y/2017/07/07-08/14	1	0	R	recurrence	pT4aN0	nil	2019/01	18	2019/0/1/21, 02/01, 02/08, 02/15, 02/22, 03/01, 03/08, 03/15, 03/22, 03/29, 04/04, 04/12, 0419,04/26, 05/03, 05/10, 05/17, 05/24, 05/31		3	E+MTX	2		50	2019/03/22 oral CT:PR	2	1	18	7	21831643	survival	0	0	1	1	0
63	OC											3	0	0	cT3N0M0	3	3	lll	1	post op	1	Y/2018/09/26~2018/11/12	0	0	R	recurrence	rycT0N0M1	nil	2019/01	9	2019/02/02,020/8,02/15,02/23,03/01,03/08,03/15,03/28,04/04	1	1	EPF	1	1	60/600-800	2019/04/04 Head MRI:PD	4	3	9	3	26536516	2019-06-30	0	0	0	1	0
49	OC											1	0	0	pT1N0M0	1	1	l	1	post op	1	Y/2018/09/17- 10/30	0	0	R	recurrence	rycT0N3bM0	nil	2019/01	21	2019/01/28, 02/15, 02/22, 03/01, 04/02, 04/09, 04/15,0 4/22, 04/30, 05/06, 05/31, 06/14, 06/21, 07/27, 08/12, 80/19,08/26, 09/2, 09/09, 09/16, 09/23	1	2	E+Taxotere+Cisplatin	2		35/35	2019/4/17 neck CT:SD	3	1	21	8	11187800	survival	0	0	1	1	1
45	OC	1	1	1	0	0						4	2	0	cT4AN2BM0	1	4	IVA	1	post op	1	Y/2018/07/14~2018/09/04	1	0	R	recurrence	T4N2bM0	nil	2019/01	0	no use		7	nil	1		nil	2019/03/01General weakness and body weight loss	4	4	0		17610961	2019-03-01	0	1	1	1	0
53	HPC	1	1	1	0	0						4	2	0	cT4AN2BM0	2	4	IVA	1	post op	1	Y/2018/10/23-12/25	1	1	R	PD after CCRT	cT4aN2bM0	nil	2019/01	5	2019/01/28,02/25,0412, 04/19, 0426	1	2	ETP	1		35/35->30mg/kg	2019/05/22 neck CT:PD	4	4	5	5	15786592	2019-06-22	0	0	0	1	0
59	HPC											4	2	0	cT4aN2bM0	2	4	IVA	0	no	1	Y/2017/11/09~2017/12/27	1	0	R	recurrence	rpT4aN3M0	nil	2019/01	1	2019-05-24		7	E	1		nil	2019/05/23 chest CT:PD	4	4	1		19650299	2019-07-23	0	1	1	1	1
47	OC	1	1	1	0	0						4	2	0	cT4aN2cM0	1	4	IVA	1	post op	1	Y/2016/08/26-10/13	1	0	R	recurrence	ypT4aN0M0	nil	2019/02	20	2019/03/03, 030/9, 03/15, 03/22, 3/29, 04/04, 04/12, 04/19 ,04/26, 05/03, 50/10, 05/24, 05/31, 06/06, 06/14, 06/21, 07/05, 07/12, 07/19, 07/26,08/02	1	1	EPF	2	1	60/800	2019/05/09 oral CT:PR	2	4	20	9	30475404	survival	0	0	3	1	0
54	OC	0	1	1	0	0	0	0	NA			4	0	0	cT4aN0M0	1	3	lll	1	post op	1	Y/2018/10/05-11/23	0	1	R	recurrence	rypT3N0M0	nil	2019/02	8	2019/03/26, 04/02, 04/09, 04/16, 04/23, 04/30, 05/07, 05/14,05/21		7	E	1		nil	2019/06/23 chest CT:PD	4	3	8	4	24476667	2019-07-01	0	0	0	0	0
67	OC	0	1	1	1	2	0	0	0			2	2	0	cT2N2bM0	1	4	IVA	1	post op	1	Y/2019/05/18-07/03	0	1	R	recurrence	pT2N3b	nil	2019/02	8	2019/03/04, 03/11, 03/18, 03/25, 04/02 ,04/16, 04/30, 05/06	1	1	EPF	1	2	75/1000	2019/05/16 PET:PD	4	4	8	3	21751480	survival	0	0	1	1	0
43	HPC	1	1	1	0	0	0	0	NA			3	2	0	cT3N2AM0	3	4	IVA	1	post op	1	Y/2018/05/16-07/12	0	0	M	recurrence and metastasis	rycT4aN3bM1	lung	2019/02	3	2019/0 2/27, 03/06, 03/12	1	1	EPF	1	1	60/600	2019/04/09tumor bleeding and hospice	4	4	3	2	22460314	2019-04-29	0	1	0	1	0
57	OC	0	1	1	0	0						3	3	0	pT3N3bM0	2	4	IVB	1	post op	1	Y/2018/05/09- 05/18	0	0	M	metastasis	rpT3N3bM1	lung	2019/03	6	2019/04/01, 04/08, 04/15, 04/22, 05/17, 05/24	1	1	EPF	1	1	60/600	2019/05/08 Bone scan:bone metastasis	4	4	6	3	20053858	2019-05-26	0	0	0	1	0
51	HPC	1	1	1	0	0				1	20190526	4	3	0	cT4BN3BM0	1	4	IVB	0	no	1	Y/2018/10/08-11/28	1	1	R	PD	cT4bN3bM0	nil	2019/03	9	2019/04/08~2019/05/28	1	1	EPF	1	1	60/800	2019/06/04 oral CT:PD	4	4	9	3	32700594	survival	0	1	1	1	1
40	OC											3	0	0	cT3N0M0	1	3	lll	1	post op	1	Y/2018/06/07~2018/08/08	0	0	M	recurrence and metastasis	ypT4aN0M0	lung	2019/03	11	2019/3/21, 03/30, 04/12, 04/23, 04/30, 05/07, 05/14, 05/20, 05/27 ,06/28 , 07/05	1	2	ETP	1		75/1000->30/30	2019/07/11 chest CT:PD	4	3	11	5	22682349	2019-10-04	0	1	1	1	1
74	OC	0	1	1	0	0				1	20191004	4	2	0	cT4aN2bM0	1	4	IVA	1	post op	1	Y/2018/09/19~2018/11/06	0	0	M	metastasis	ypT1N3bM0	skin	2019/04	11	2019/04/15, 04/22, 04/29, 05/06, 05/13, 05/20, 05/27, 06/03, 06/10, 06/17, 06/24		7	E	1		nil	2019/07/16 chest CT:PD	4	4	11	4	21854436	survival	0	1	1	1	1
33	OC	0	0	1		8	NA	NA	1			3	3	0	cT3N3bM0	N/A	4	IV	0	no	1	Y/2018/09-2018/10	0	1	R	recurrence	ycT3N0M0	nil	2019/04	11	2019/04/15, 04/22, 04/29, 05/06, 05/13, 05/27, 06/03, 06/10, 06/24, 07/01, 07/08	1	1	EPF	1	2	75/1000	2019/07/01 neckCT:PD	4	4	11	3	32220443	2019-07-22	0	1	1	1	0
57	OC	1	1	1	0	0						3	0	0	cT3N0M0	1	3	lll	1	post op	1	Y/2018/12/11~2019/01/22	1	0	M	metastasis	rcTxN2bM1	lung	2019/04	6	2019/05/04. 05/10,05/17,05/24,05/31,06/06	1	1	EPF	1	1	60/600	PD	4	3	6	2	29914888	2019-06-16	0	3	0	2	0
58	OC											2	1	0	pT2N1M0	2	3	lll	1	post op	1	Y/2018/10/05~2018/11/14	1	0	M	metastasis	rcTxNxM1	lung	2019/04	9	2019/04/30, 05/07, 05/14, 05/21, 05/28, 06/04, 06/11, 06/18, 06/25	1	1	EPF	1			2019/06/04 chest CT:PD	4	3	9	3	18831336	survival	1	1	1	1	1
48	OC											4	2	0	T4aN2bM0	2	4	IVA	1	post op	1	Y/2018/10/04-11/29	1	0	M	metastasis	ypT0N3M0	lung	2019/04	2	2019/04/27,05/03	1	1	EPF	1	1	60/600	PD	4	4	2	2	21345135	2019-05-28	0	1	2	2	1
[truncated: 3 more columns]
